# Supplementary material for: An Effective ABC‐SVM Approach for Surface Roughness Prediction in Manufacturing Processes
Source: Hindawi journal article supplement (doi:10.1155/2019/3094670), 2019-01-01
Supplement: f1 [file 3094670.f1.docx]

Table 1 Input parameters and experimental values of Ra for AISI1045

| Experiment # i | Cutting speed(*v*)  (m/min) | Feed rate(f)  (mm/rev) | Depth of cut(d) (mm) | Tool nose radius(r)(mm) | Surface roughness(μm) |
| --- | --- | --- | --- | --- | --- |
| 1 | 150 | 0.25 | 1 | 1.2 | 1.800 |
| 2 | 180 | 0.15 | 1 | 0.8 | 1.235 |
| 3 | 180 | 0.2 | 1.5 | 0.8 | 2.262 |
| 4 | 120 | 0.15 | 1 | 0.8 | 1.170 |
| 5 | 150 | 0.2 | 1 | 0.8 | 2.180 |
| 6 | 180 | 0.2 | 1 | 0.4 | 3.225 |
| 7 | 150 | 0.2 | 1 | 0.8 | 2.037 |
| 8 | 120 | 0.2 | 0.5 | 0.8 | 2.011 |
| 9 | 150 | 0.25 | 1.5 | 0.8 | 3.013 |
| 10 | 150 | 0.2 | 1 | 0.8 | 1.932 |
| 11 | 120 | 0.25 | 1 | 0.8 | 3.086 |
| 12 | 150 | 0.25 | 1 | 0.4 | 4.098 |
| 13 | 150 | 0.2 | 1.5 | 0.4 | 3.325 |
| 14 | 150 | 0.25 | 0.5 | 0.8 | 2.976 |
| 16 | 120 | 0.2 | 1 | 0.4 | 3.302 |
| 17 | 150 | 0.2 | 1 | 0.8 | 2.162 |
| 18 | 120 | 0.2 | 1.5 | 0.8 | 2.324 |
| 19 | 150 | 0.2 | 1.5 | 1.2 | 1.217 |
| 20 | 150 | 0.15 | 1.5 | 0.8 | 1.325 |
| 22 | 150 | 0.2 | 1 | 0.8 | 1.995 |
| 21 | 180 | 0.2 | 1 | 1.2 | 1.174 |
| 22 | 150 | 0.15 | 1 | 0.4 | 2.048 |
| 23 | 150 | 0.15 | 0.5 | 0.8 | 1.298 |
| 24 | 150 | 0.2 | 0.5 | 0.4 | 2.863 |
| 25 | 150 | 0.2 | 0.5 | 1.2 | 1.121 |
| 26 | 180 | 0.2 | 0.5 | 0.8 | 1.888 |
| 27 | 180 | 0.25 | 1 | 0.8 | 3.169 |
| 28 | 120 | 0.2 | 1 | 1.2 | 1.246 |
| 29 | 150 | 0.15 | 1 | 1.2 | 0.750 |

Table 2 Input parameters and experimental values of Ra for TC18 titanium alloy

| Experiment # i | Cutting speed(*v*)  (rev/min) | Feed rate  (*f*)(mm/rev) | Radial depth of cut(*rd*) (mm) | Axial depth of cut(*ad*) (mm) | Surface roughness(μm) |
| --- | --- | --- | --- | --- | --- |
| 1 | 1000 | 0.08 | 1 | 0.1 | 0.658 |
| 2 | 1500 | 0.08 | 3 | 0.4 | 1.086 |
| 3 | 2000 | 0.08 | 5 | 0.25 | 0.600 |
| 4 | 1000 | 0.1 | 3 | 0.25 | 0.540 |
| 5 | 1500 | 0.1 | 5 | 0.1 | 0.649 |
| 6 | 2000 | 0.1 | 1 | 0.4 | 0.631 |
| 7 | 1000 | 0.12 | 5 | 0.4 | 0.451 |
| 8 | 1500 | 0.12 | 1 | 0.25 | 0.663 |
| 9 | 2000 | 0.12 | 3 | 0.1 | 0.689 |
|  | | | | | | |

Table 3 Input parameters and experimental values of Ra for Compacted Graphite Iron

| Experiment # i | Cutting speed(*v*)(m/min) | Feed speed(*vf*)(mm/min) | Surface roughness(μm) |
| --- | --- | --- | --- |
| 1 | 226 | 180 | 1.4094 |
| 2 | 452 | 180 | 0.3403 |
| 3 | 678 | 180 | 0.3318 |
| 4 | 904 | 180 | 0.3238 |
| 5 | 226 | 360 | 2.507 |
| 6 | 452 | 360 | 0.7867 |
| 7 | 678 | 360 | 0.4302 |
| 8 | 904 | 360 | 0.5298 |
| 9 | 226 | 540 | 3.659 |
| 10 | 452 | 540 | 1.5505 |
| 11 | 678 | 540 | 0.5570 |
| 12 | 904 | 540 | 0.4785 |
| 13 | 226 | 720 | 4.4332 |
| 14 | 452 | 720 | 2.3822 |
| 15 | 678 | 720 | 0.6453 |
| 16 | 904 | 720 | 0.7173 |
| 17 | 226 | 900 | 4.1203 |
| 18 | 452 | 900 | 3.2772 |
| 19 | 678 | 900 | 0.794 |
| 20 | 904 | 900 | 0.7732 |
|  |  |  |  |
